# Supplementary material
Source: PubMed Central journal article supplement (PMC6680254)
Supplement: mmc2.pdf [file mmc2.pdf]

AGGAAAGGAAGGAGAAGAGAGAGCTGACTAGAAAGGAAACAGCCACATCTCAGTATAGTAC  
GGTT**CACGT**CAGAGAAGGCTTTCTGTAGAAGGAGAGCTGGGAGAAGCAGAAAGCAGGAAG  
-3042  
GTCACTGGAGGCTGAGGGGCAGGCACCACATGCAAAGATGGCTACAGCTGAACATGGGGC  
ACATGCTCATTAGCCCAACTGAGGCAAGAGATCAGGAGTTCAAGT**CACGC**TTGGGCTACA  
-2876  
CATAAAACCTCTCAAAGCCAAACCAAGTAGGATATGGTGGAGCGTGCCCAGGACCTCAG  
CCCGTAGGAGGGGAGGCAGGAGAATGCCAAGCTCAAGGTTGCCTGTGGCTAGAGAGACCA  
TCCTGAGTTACATGAAACCTTAAATAACCAACAGCTGTCTTGTGAATTTCAGAGAATTAC  
AAGCTCACTGTAGACAGAGTAGGAAAGGTAGCTCAGCAGTAAAGAACATGCCTCAAAAAC  
CAAGGGCTTGCTGGGCAGTTGGTGGCG**CACGC**CTTAAATCCCAGCACTTGGGAG.....  
-2589  
CCAGGATTATTGGT**ACGTG**CCACATACCTAGCTGCTTACAACCTTCTAACCGGGT.....  
-1097  
GTCCGGACACCTCGGGGGCTGGGGCCCGGGAGGAGGCGGCCACAGACCGGAGCGGGCGG  
AGC**CACGT**AACCGCAAGTCTAGGGCCAGAAACCCAAGCCGGACCCACGGAGCCGCGTGG  
-444  
ACTGAGCGGGGCGGGGGACCCAGGGGTAACCGAGTGGGTAGCCAGCCCGGGGAAGTGGCG  
TACGCTGTCCCGGAAGGAAGTCGACCACTGAGGCAGGGCGGTCCGGGGCGGGGCGGAGCA  
GGCTGCTGGCCGCGTCCGCGCGTCCCCGCGTCCCTCCCGCCGCCCTCGAGCCCCGCG  
GGCCGCGCTTACCCGCCCTCCCGGCCGCGGCCGCGCTCCTCAGGACACCGAGCGTTCGG  
GGCCGGAACCCGGAGACAAGCCGGTGCCGATTGGCGACGCTCCGT**CACGTG**ACCGCAACG  
-95 / -94  
CTCCGCCGGCGCCAATTTCAAACAGCGGAACAACCTGAAAGCGGCGCTGCGGGACCCACCC  
CCGGCCCCGGGCTCCCCCGTC (-1)

Figure S2
