# Supplementary material
Source: PubMed Central journal article supplement (PMC6680254)

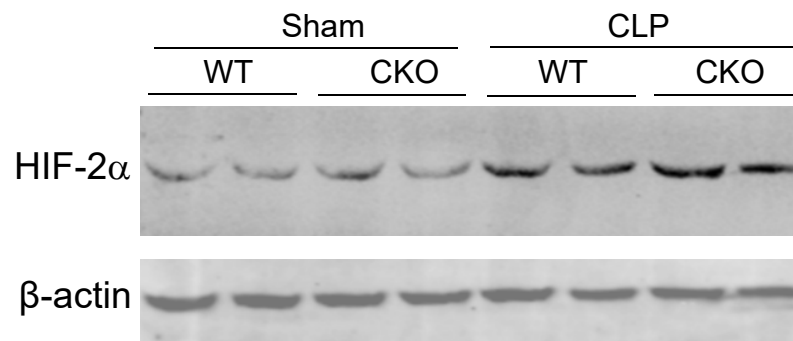

Figure S1

Supplement: mmc1.pdf [file mmc1.pdf]

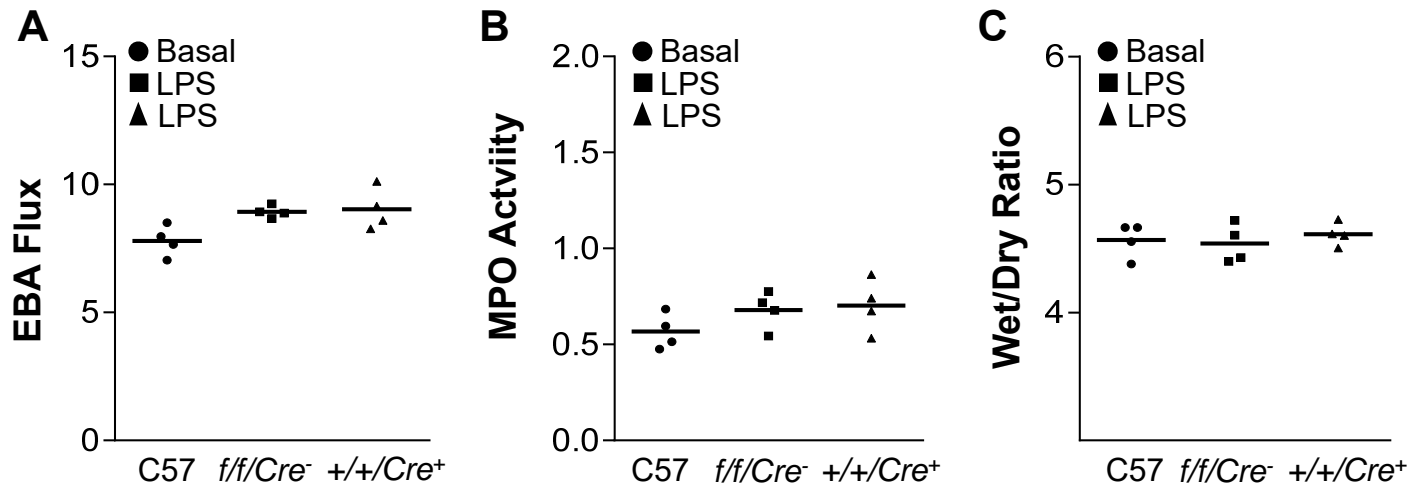

Figure S3

Supplement: mmc3.pdf [file mmc3.pdf]
